# Supplementary material for: Genetic activity during early plant embryogenesis
Source: PubMed Central journal article supplement — Biochem J. 2020 Oct 12;477(19):3743–67. doi: 10.1042/BCJ20190161 (PMC7557148; doi:10.1042/bcj20190161), 2020-10-12
Supplement: BCJ-477-3743-s1.pdf [file BCJ-477-3743-s1.pdf]

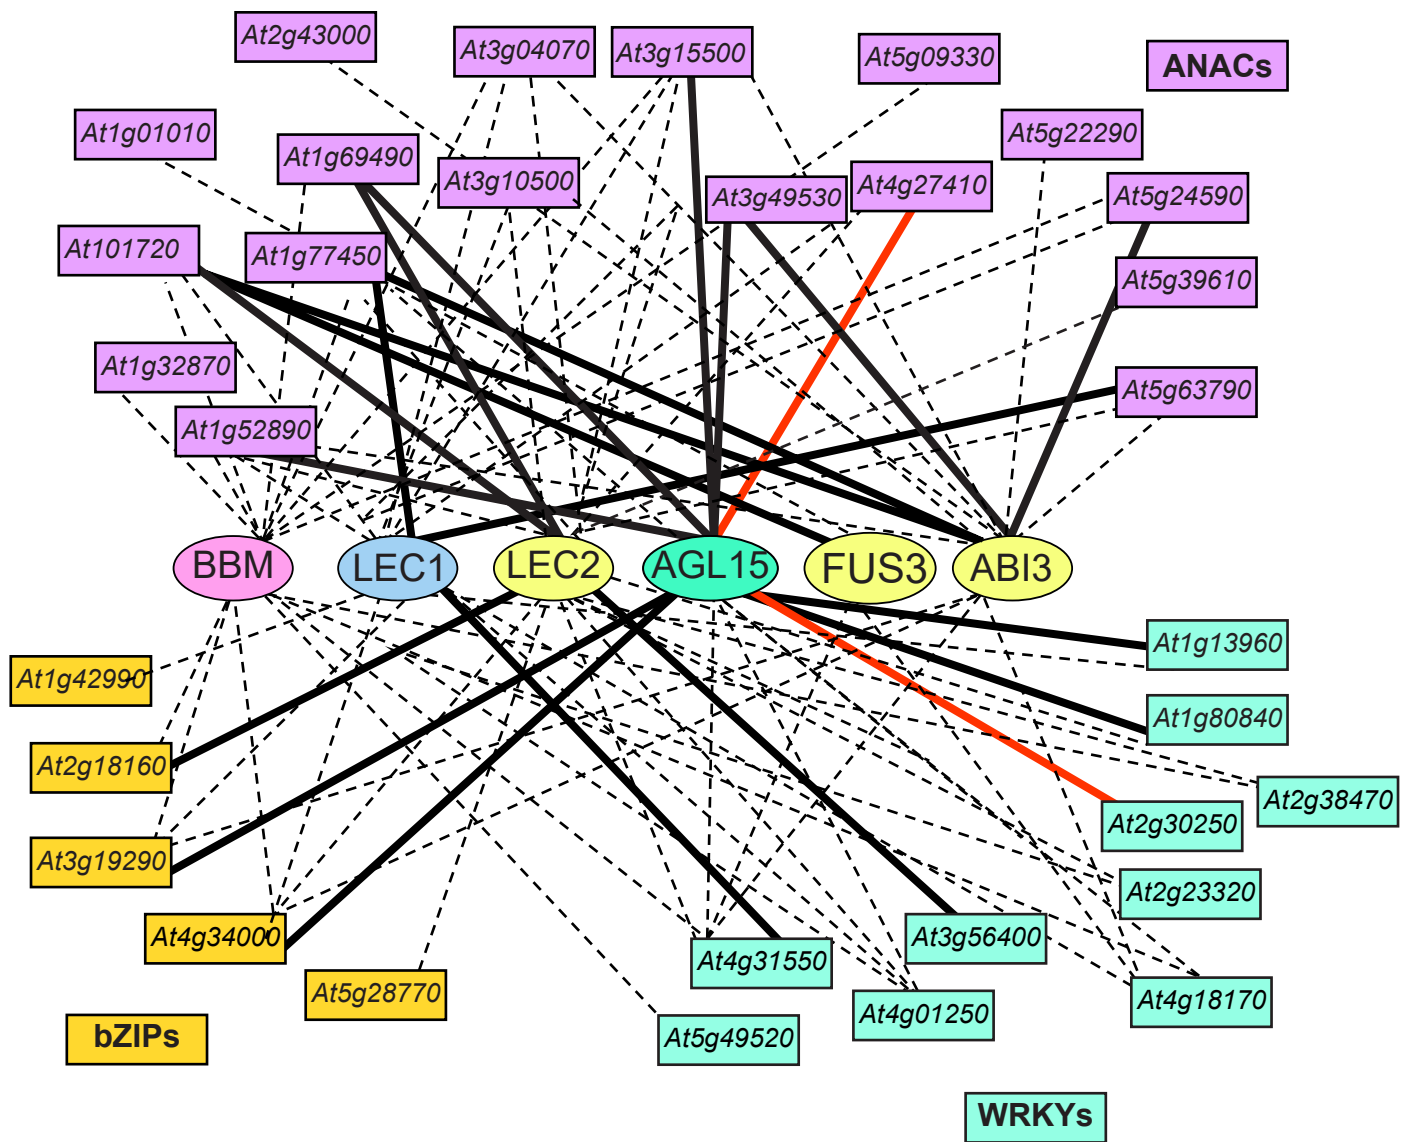

Supplemental Figure 1. Interactions between LAFs, AGL15 and BBM with genes encoding TF's associated with dedifferentiation (as summarized by Grafi, 2011). Solid lines indicate direct induction of expression of the target TF gene. Red solid lines indicate direct repression by AGL15. Dotted lines indicate interactions for which studies indicate direct association with regulatory regions of the gene, but no response in transcript accumulation for tissues tested. BBM data is from Horstmann et al., 2017; LEC1 from Pelletier et al., 2017; LEC2 from Braybrook et al., 2006 and Wang et al., 2020; AGL15 from Zheng et al., 2009; FUS3 from Wang and Perry, 2013; and ABI3 from Tian et al., 2020.
